# Supplementary material for: Monodisperse measurement of the biotin-streptavidin interaction strength in a well-defined pulling geometry
Source: PLOS journal article supplement (doi:10.1371/journal.pone.0188722), 2017-12-05
Supplement: S6 (10.1371/journal.pone.0188722.s006) [file journal.pone.0188722.s006]

**Fitted Bell-Evans distributions shown in Fig 6**

| <b>First ddFLN4 unfolding peak</b>  |                    |                    |                    |                    |                    |
|-------------------------------------|--------------------|--------------------|--------------------|--------------------|--------------------|
| $v$ [nm/s]                          | <b>200</b>         | <b>800</b>         | <b>2,000</b>       | <b>5,000</b>       | <b>10,000</b>      |
| $\dot{F}$ [pN/s]                    | 768                | 3,519              | 10,080             | 29,010             | 66,710             |
| $F$ [pN]                            | 66                 | 75                 | 83                 | 89                 | 90                 |
| $\Delta x_0$ [nm]                   | 0.56               | 0.47               | 0.37               | 0.42               | 0.42               |
| $k_{off,0}$ [s <sup>-1</sup> ]      | $7 \times 10^{-3}$ | $7 \times 10^{-2}$ | $6 \times 10^{-1}$ | $4 \times 10^{-1}$ | $7 \times 10^{-1}$ |
| <b>Second ddFLN4 unfolding peak</b> |                    |                    |                    |                    |                    |
| $v$ [nm/s]                          | <b>200</b>         | <b>800</b>         | <b>2,000</b>       | <b>5,000</b>       | <b>10,000</b>      |
| $\dot{F}$ [pN/s]                    | 701                | 3,609              | 9,841              | 29,820             | 76,030             |
| $F$ [pN]                            | 59                 | 70                 | 78                 | 87                 | 94                 |
| $\Delta x_0$ [nm]                   | 0.47               | 0.50               | 0.41               | 0.42               | 0.34               |
| $k_{off,0}$ [s <sup>-1</sup> ]      | $1 \times 10^{-1}$ | $9 \times 10^{-2}$ | $4 \times 10^{-1}$ | $5 \times 10^{-1}$ | 2                  |
| <b>Biotin:mSA unbinding peak</b>    |                    |                    |                    |                    |                    |
| $v$ [nm/s]                          | <b>200</b>         | <b>800</b>         | <b>2,000</b>       | <b>5,000</b>       | <b>10,000</b>      |
| $\dot{F}$ [pN/s]                    | 1,736              | 7,469              | 20,680             | 52,390             | 111,900            |
| $F$ [pN]                            | 201                | 212                | 217                | 222                | 230                |
| $\Delta x_0$ [nm]                   | 0.33               | 0.35               | 0.37               | 0.28               | 0.22               |
| $k_{off,0}$ [s <sup>-1</sup> ]      | $2 \times 10^{-5}$ | $9 \times 10^{-6}$ | $8 \times 10^{-6}$ | $1 \times 10^{-3}$ | $2 \times 10^{-1}$ |

**Table A. Fitted Bell-Evans distributions shown in Fig 6.** To the histograms shown in Fig 6, Bell-Evans distributions were fitted. Mean loading rate used for the fit, most probable rupture force determined from the fit, and fitting parameters (distance to transition state and zero-force off-rate) are listed for the five retraction velocities and the different force peaks.
